# Supplementary material for: Identification of Isoflavonoid Biosynthesis-Related R2R3-MYB Transcription Factors in Callerya speciosa (Champ. ex Benth.) Schot Using Transcriptome-Based Gene Coexpression Analysis
Source: Hindawi journal article supplement (doi:10.1155/2021/9939403), 2021-05-25

ESM\_6 Logo sequences of each motif of 10 conserved motifs shared by proteins of R2R3-MYB subfamilies.

Motif 1

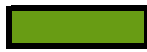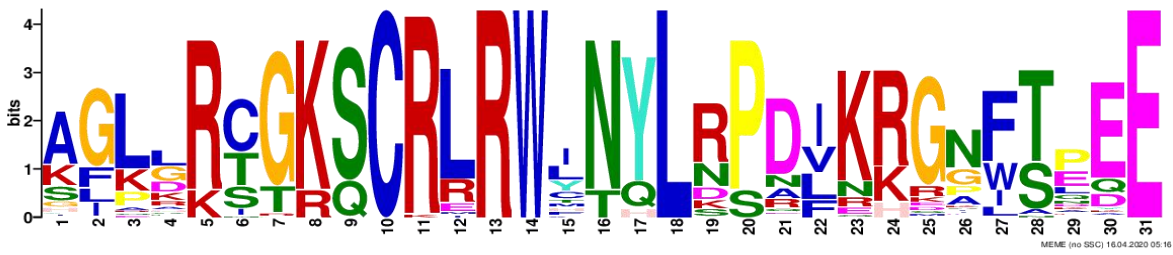

Motif 2

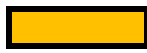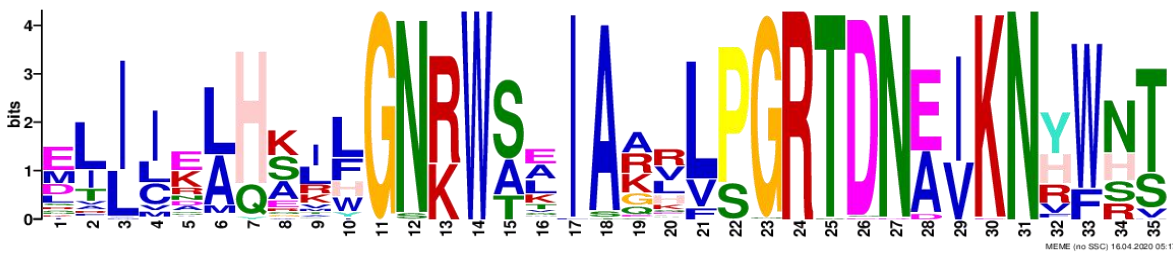

Motif 3

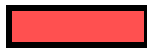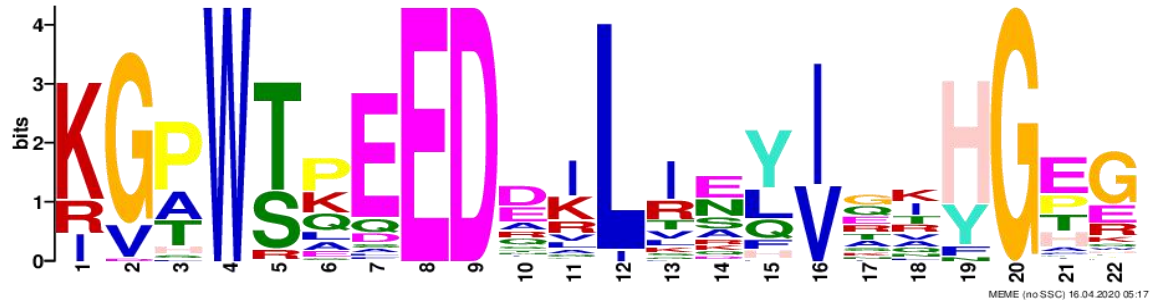

Motif 4

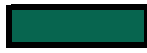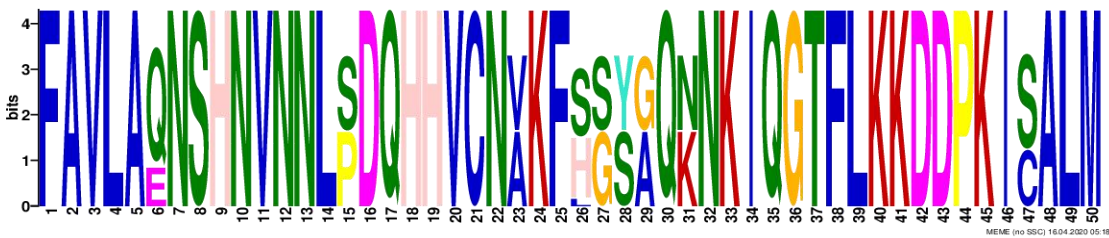

Motif 5

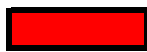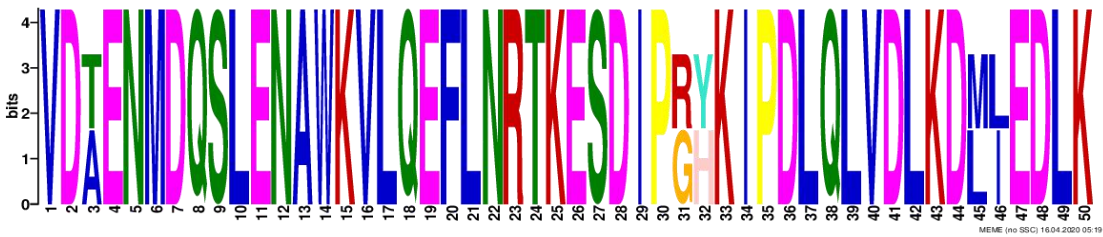

Motif 6

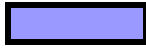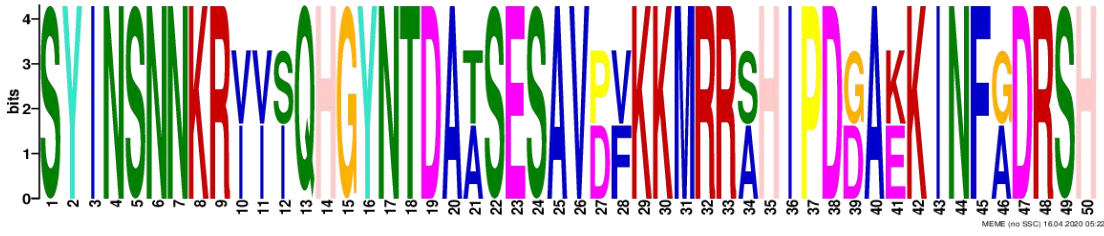

Motif 7

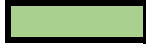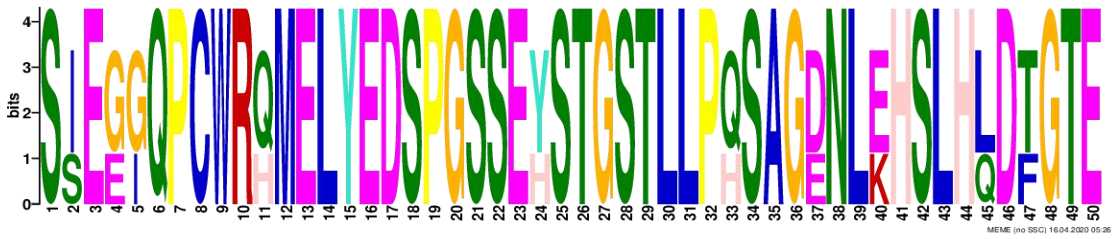

Motif 8

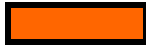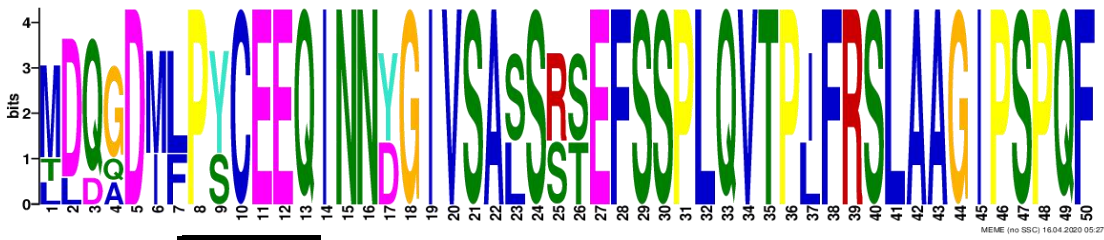

Motif 9

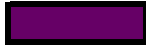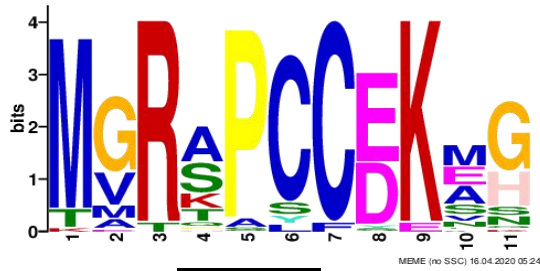

Motif 10

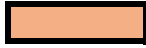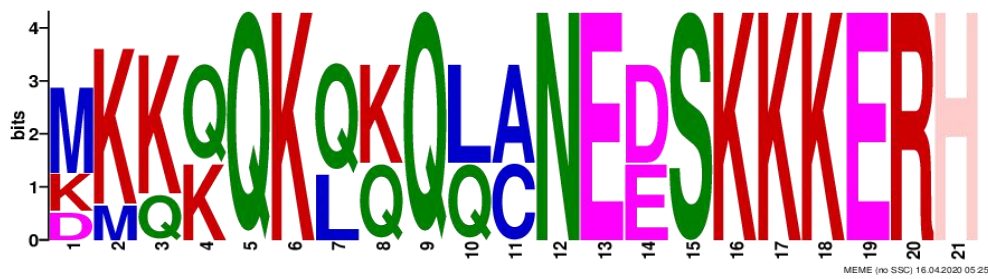

Supplement: f6 [file 9939403.f6.pdf]
