# Supplementary material for: Identification of Isoflavonoid Biosynthesis-Related R2R3-MYB Transcription Factors in Callerya speciosa (Champ. ex Benth.) Schot Using Transcriptome-Based Gene Coexpression Analysis
Source: Hindawi journal article supplement (doi:10.1155/2021/9939403), 2021-05-25
Supplement: f1 [file 9939403.f1.pdf]

**ESM 1 Physicochemical properties of *R2R3-MYB* family members in *C. speciosa***

| <b>Nomenclature used<br/>for this paper</b> | <b>PI (aa)</b> | <b>MW<br/>(kDa)</b> | <b>pI</b> | <b><math>\alpha</math>-helix (%)</b> | <b><math>\beta</math>-turn (%)</b> |
|---------------------------------------------|----------------|---------------------|-----------|--------------------------------------|------------------------------------|
| CsMYB1                                      | 311            | 33.70               | 9.09      | 27.31                                | 3.88                               |
| CsMYB2                                      | 313            | 33.71               | 9.09      | 27.23                                | 3.96                               |
| CsMYB3                                      | 312            | 33.70               | 9.09      | 27.33                                | 3.86                               |
| CsMYB4                                      | 317            | 33.72               | 9.11      | 24.29                                | 2.84                               |
| CsMYB5                                      | 116            | 13.49               | 9.36      | 47.41                                | 10.34                              |
| CsMYB6                                      | 257            | 29.31               | 9.61      | 23.35                                | 5.45                               |
| CsMYB7                                      | 252            | 28.76               | 9.02      | 34.13                                | 6.75                               |
| CsMYB8                                      | 110            | 12.88               | 9.59      | 31.82                                | 11.82                              |
| CsMYB9                                      | 180            | 21.00               | 9.49      | 45.56                                | 7.78                               |
| CsMYB10                                     | 180            | 21.01               | 9.49      | 45.56                                | 7.78                               |
| CsMYB11                                     | 1050           | 116.22              | 5.27      | 25.52                                | 2.19                               |
| CsMYB12                                     | 210            | 24.11               | 9.20      | 42.86                                | 5.71                               |
| CsMYB13                                     | 345            | 38.72               | 6.63      | 33.62                                | 5.22                               |
| CsMYB14                                     | 292            | 33.09               | 9.08      | 29.45                                | 7.53                               |
| CsMYB15                                     | 178            | 20.75               | 9.42      | 29.21                                | 7.87                               |
| CsMYB16                                     | 297            | 32.97               | 8.74      | 24.24                                | 5.05                               |
| CsMYB17                                     | 294            | 32.59               | 8.74      | 27.21                                | 4.42                               |
| CsMYB18                                     | 572            | 62.95               | 8.71      | 26.57                                | 3.15                               |
| CsMYB19                                     | 572            | 62.95               | 8.71      | 26.57                                | 3.15                               |
| CsMYB20                                     | 476            | 53.58               | 6.42      | 36.55                                | 4.41                               |
| CsMYB21                                     | 478            | 53.85               | 7.62      | 37.24                                | 4.28                               |
| CsMYB22                                     | 333            | 38.55               | 8.92      | 45.05                                | 5.11                               |
| CsMYB23                                     | 477            | 53.94               | 8.69      | 37.11                                | 4.19                               |
| CsMYB24                                     | 478            | 54.06               | 8.41      | 38.70                                | 3.97                               |
| CsMYB25                                     | 478            | 54.06               | 8.58      | 38.28                                | 3.97                               |
| CsMYB26                                     | 477            | 53.95               | 8.58      | 36.48                                | 3.98                               |
| CsMYB27                                     | 476            | 53.88               | 8.55      | 36.34                                | 4.41                               |
| CsMYB28                                     | 334            | 38.62               | 9.04      | 46.11                                | 5.39                               |
| CsMYB29                                     | 442            | 49.85               | 6.05      | 35.75                                | 4.98                               |
| CsMYB30                                     | 334            | 38.61               | 9.04      | 44.61                                | 5.69                               |
| CsMYB31                                     | 442            | 50.02               | 8.03      | 37.56                                | 4.75                               |
| CsMYB32                                     | 477            | 53.78               | 6.42      | 38.99                                | 3.77                               |
| CsMYB33                                     | 477            | 53.67               | 6.42      | 39.41                                | 3.98                               |
| CsMYB34                                     | 477            | 53.94               | 8.69      | 37.11                                | 4.19                               |
| CsMYB35                                     | 333            | 38.55               | 8.92      | 45.05                                | 5.11                               |
| CsMYB36                                     | 228            | 26.26               | 9.16      | 23.25                                | 8.33                               |
| CsMYB37                                     | 269            | 30.47               | 8.27      | 38.29                                | 6.32                               |
| CsMYB38                                     | 116            | 13.20               | 7.66      | 37.07                                | 11.21                              |
| CsMYB39                                     | 300            | 34.22               | 7.70      | 29.33                                | 4.00                               |
| CsMYB40                                     | 363            | 39.57               | 9.28      | 21.76                                | 6.34                               |
| CsMYB41                                     | 277            | 30.53               | 8.78      | 31.77                                | 4.69                               |
| CsMYB42                                     | 250            | 27.77               | 8.78      | 40.00                                | 6.40                               |
| CsMYB43                                     | 277            | 30.45               | 8.78      | 36.10                                | 4.33                               |
| CsMYB44                                     | 248            | 27.37               | 8.79      | 34.68                                | 6.85                               |
| CsMYB45                                     | 276            | 30.52               | 8.78      | 22.46                                | 6.16                               |
| CsMYB46                                     | 249            | 27.48               | 8.79      | 31.33                                | 7.23                               |
| CsMYB47                                     | 264            | 30.05               | 5.66      | 30.68                                | 6.44                               |
| CsMYB48                                     | 220            | 25.76               | 8.30      | 33.18                                | 4.55                               |
| CsMYB49                                     | 242            | 28.58               | 8.22      | 33.47                                | 4.96                               |

|          |     |       |      |       |       |
|----------|-----|-------|------|-------|-------|
| CsMYB50  | 360 | 40.72 | 6.20 | 33.33 | 4.17  |
| CsMYB51  | 352 | 39.80 | 6.03 | 36.36 | 3.98  |
| CsMYB52  | 358 | 40.48 | 5.95 | 31.56 | 3.07  |
| CsMYB53  | 370 | 41.17 | 7.59 | 25.95 | 5.41  |
| CsMYB54  | 379 | 42.28 | 8.95 | 24.27 | 2.64  |
| CsMYB55  | 292 | 32.87 | 8.19 | 35.27 | 5.82  |
| CsMYB56  | 292 | 32.88 | 8.49 | 35.96 | 7.53  |
| CsMYB57  | 154 | 18.02 | 9.77 | 27.92 | 12.99 |
| CsMYB58  | 317 | 36.27 | 5.59 | 30.28 | 4.42  |
| CsMYB59  | 318 | 23.09 | 5.80 | 29.87 | 4.09  |
| CsMYB60  | 105 | 12.16 | 9.03 | 31.43 | 10.48 |
| CsMYB61  | 308 | 35.05 | 5.80 | 31.17 | 5.52  |
| CsMYB62  | 318 | 36.42 | 5.80 | 29.87 | 4.09  |
| CsMYB63  | 206 | 22.99 | 9.34 | 28.64 | 4.37  |
| CsMYB64  | 206 | 36.96 | 9.34 | 31.55 | 7.28  |
| CsMYB65  | 271 | 30.87 | 5.27 | 33.95 | 1.48  |
| CsMYB66  | 267 | 30.53 | 5.57 | 32.58 | 4.49  |
| CsMYB67  | 271 | 30.90 | 5.56 | 26.94 | 5.54  |
| CsMYB68  | 272 | 31.02 | 5.40 | 29.78 | 4.04  |
| CsMYB69  | 272 | 31.01 | 5.40 | 29.78 | 4.04  |
| CsMYB70  | 111 | 12.51 | 6.90 | 27.93 | 11.71 |
| CsMYB71  | 269 | 29.96 | 5.99 | 43.49 | 4.83  |
| CsMYB72  | 218 | 47.42 | 9.53 | 44.50 | 6.42  |
| CsMYB73  | 114 | 13.25 | 9.05 | 33.33 | 13.16 |
| CsMYB74  | 269 | 30.33 | 5.57 | 43.87 | 4.09  |
| CsMYB75  | 347 | 37.82 | 6.47 | 32.56 | 1.44  |
| CsMYB76  | 258 | 29.97 | 8.93 | 50.78 | 6.59  |
| CsMYB77  | 255 | 29.55 | 6.91 | 46.27 | 5.88  |
| CsMYB78  | 239 | 27.54 | 8.93 | 38.49 | 8.79  |
| CsMYB79  | 109 | 12.88 | 9.57 | 50.46 | 12.84 |
| CsMYB80  | 220 | 24.51 | 9.36 | 39.09 | 3.18  |
| CsMYB81  | 248 | 28.04 | 9.36 | 26.61 | 5.65  |
| CsMYB82  | 353 | 37.94 | 5.62 | 26.35 | 4.53  |
| CsMYB83  | 351 | 37.71 | 5.50 | 27.64 | 4.84  |
| CsMYB84  | 240 | 27.56 | 5.75 | 32.08 | 5.42  |
| CsMYB85  | 351 | 37.71 | 5.50 | 27.64 | 4.84  |
| CsMYB86  | 445 | 49.89 | 7.53 | 30.79 | 3.60  |
| CsMYB87  | 272 | 76.59 | 5.36 | 32.35 | 5.15  |
| CsMYB88  | 196 | 22.34 | 9.02 | 35.71 | 6.63  |
| CsMYB89  | 324 | 36.67 | 6.23 | 35.49 | 4.94  |
| CsMYB90  | 371 | 41.69 | 4.77 | 30.46 | 5.39  |
| CsMYB91  | 365 | 39.59 | 8.94 | 25.75 | 4.11  |
| CsMYB92  | 397 | 42.74 | 6.86 | 20.40 | 4.28  |
| CsMYB93  | 363 | 40.77 | 6.72 | 32.78 | 4.96  |
| CsMYB94  | 283 | 31.24 | 6.55 | 31.45 | 4.24  |
| CsMYB95  | 282 | 32.42 | 6.71 | 29.43 | 3.90  |
| CsMYB96  | 426 | 48.07 | 8.57 | 22.54 | 2.58  |
| CsMYB97  | 343 | 37.18 | 5.74 | 25.07 | 2.62  |
| CsMYB98  | 107 | 12.32 | 9.40 | 39.25 | 12.15 |
| CsMYB99  | 226 | 24.73 | 8.42 | 36.28 | 5.75  |
| CsMYB100 | 240 | 27.59 | 5.75 | 27.92 | 5.00  |
| CsMYB101 | 293 | 32.83 | 4.85 | 24.91 | 5.12  |

---

| <b>extended strand (%)</b> | <b>random coil (%)</b> | <b>Subcellular localization prediction</b> |
|----------------------------|------------------------|--------------------------------------------|
| 6.72                       | 62.09                  | Nucleus                                    |
| 6.74                       | 62.07                  | Nucleus                                    |
| 6.75                       | 62.06                  | Nucleus                                    |
| 7.26                       | 65.62                  | Nucleus                                    |
| 12.07                      | 30.17                  | Nucleus                                    |
| 12.06                      | 59.14                  | Nucleus                                    |
| 15.08                      | 44.05                  | Nucleus                                    |
| 10.91                      | 45.45                  | Nucleus                                    |
| 1.11                       | 45.56                  | Nucleus                                    |
| 1.11                       | 45.56                  | Nucleus                                    |
| 8.48                       | 63.81                  | Nucleus                                    |
| 7.14                       | 44.29                  | Nucleus                                    |
| 10.14                      | 51.01                  | Nucleus                                    |
| 11.30                      | 51.71                  | Nucleus                                    |
| 6.74                       | 56.18                  | Nucleus                                    |
| 9.76                       | 60.94                  | Nucleus                                    |
| 11.22                      | 57.14                  | Nucleus                                    |
| 3.85                       | 66.43                  | Nucleus                                    |
| 3.85                       | 66.43                  | Nucleus                                    |
| 7.98                       | 51.05                  | Nucleus                                    |
| 8.37                       | 50.21                  | Nucleus                                    |
| 8.41                       | 41.44                  | Nucleus                                    |
| 8.18                       | 50.52                  | Nucleus                                    |
| 8.37                       | 48.95                  | Nucleus                                    |
| 8.79                       | 48.95                  | Nucleus                                    |
| 9.43                       | 50.10                  | Nucleus                                    |
| 8.61                       | 50.63                  | Nucleus                                    |
| 8.68                       | 39.82                  | Nucleus                                    |
| 9.05                       | 50.23                  | Nucleus                                    |
| 8.08                       | 41.62                  | Nucleus                                    |
| 8.82                       | 48.87                  | Nucleus                                    |
| 8.81                       | 48.43                  | Nucleus                                    |
| 8.81                       | 47.80                  | Nucleus                                    |
| 8.18                       | 50.52                  | Nucleus                                    |
| 8.41                       | 41.44                  | Nucleus                                    |
| 17.98                      | 50.44                  | Nucleus                                    |
| 7.43                       | 47.96                  | Nucleus                                    |
| 15.52                      | 36.21                  | Nucleus                                    |
| 6.67                       | 60.00                  | Nucleus                                    |
| 8.82                       | 63.09                  | Nucleus                                    |
| 8.30                       | 55.23                  | Nucleus                                    |
| 4.80                       | 48.80                  | Nucleus                                    |
| 7.58                       | 51.99                  | Nucleus                                    |
| 9.27                       | 49.19                  | Nucleus                                    |
| 10.51                      | 60.87                  | Nucleus                                    |
| 7.63                       | 50.82                  | Nucleus                                    |
| 9.85                       | 53.03                  | Nucleus                                    |
| 7.73                       | 54.55                  | Nucleus                                    |
| 10.33                      | 51.24                  | Nucleus                                    |

|       |       |         |
|-------|-------|---------|
| 8.89  | 53.61 | Nucleus |
| 5.68  | 53.98 | Nucleus |
| 6.98  | 58.38 | Nucleus |
| 9.19  | 59.46 | Nucleus |
| 7.65  | 65.44 | Nucleus |
| 7.19  | 51.71 | Nucleus |
| 9.25  | 47.26 | Nucleus |
| 20.78 | 38.31 | Nucleus |
| 7.89  | 57.41 | Nucleus |
| 6.92  | 59.12 | Nucleus |
| 16.19 | 41.90 | Nucleus |
| 5.84  | 57.47 | Nucleus |
| 6.92  | 59.12 | Nucleus |
| 2.43  | 64.56 | Nucleus |
| 3.88  | 57.28 | Nucleus |
| 4.80  | 59.78 | Nucleus |
| 0.00  | 62.92 | Nucleus |
| 4.43  | 63.10 | Nucleus |
| 3.68  | 62.50 | Nucleus |
| 3.68  | 62.50 | Nucleus |
| 16.22 | 44.14 | Nucleus |
| 8.92  | 42.75 | Nucleus |
| 1.83  | 47.25 | Nucleus |
| 2.63  | 50.88 | Nucleus |
| 5.20  | 46.84 | Nucleus |
| 4.61  | 61.38 | Nucleus |
| 5.81  | 36.82 | Nucleus |
| 5.10  | 42.75 | Nucleus |
| 8.37  | 44.35 | Nucleus |
| 5.50  | 31.19 | Nucleus |
| 4.09  | 53.64 | Nucleus |
| 9.68  | 58.06 | Nucleus |
| 10.48 | 58.64 | Nucleus |
| 9.97  | 57.55 | Nucleus |
| 6.25  | 56.25 | Nucleus |
| 9.97  | 57.55 | Nucleus |
| 4.49  | 61.12 | Nucleus |
| 2.57  | 59.93 | Nucleus |
| 7.14  | 50.51 | Nucleus |
| 5.86  | 53.70 | Nucleus |
| 6.47  | 57.68 | Nucleus |
| 10.14 | 60.00 | Nucleus |
| 15.11 | 60.20 | Nucleus |
| 16.25 | 46.01 | Nucleus |
| 11.66 | 52.65 | Nucleus |
| 3.90  | 62.77 | Nucleus |
| 7.51  | 67.37 | Nucleus |
| 9.04  | 63.27 | Nucleus |
| 15.89 | 32.71 | Nucleus |
| 6.64  | 51.33 | Nucleus |
| 4.17  | 62.92 | Nucleus |
| 4.44  | 65.53 | Nucleus |

---
