# Supplementary material for: Identification of Isoflavonoid Biosynthesis-Related R2R3-MYB Transcription Factors in Callerya speciosa (Champ. ex Benth.) Schot Using Transcriptome-Based Gene Coexpression Analysis
Source: Hindawi journal article supplement (doi:10.1155/2021/9939403), 2021-05-25
Supplement: f3 [file 9939403.f3.pdf]

**ESM 3 List of 18 R2R3 MYB proteins/genes from other plants and their reported functions.**

| <b>Gene/Protein name</b> | <b>ID</b>      | <b>Species</b>                | <b>Functions</b>                                                                      |
|--------------------------|----------------|-------------------------------|---------------------------------------------------------------------------------------|
| AmMYB308                 | P81393         | <i>Antirrhinum majus</i>      | Activator for phenylpropanoid and lignin biosynthesis                                 |
| GmMYB58                  | XP_003525887   | <i>Glycine max</i>            | Activator for isoflavonoid biosynthesis                                               |
| GmMYB205                 | XP_003550620   | <i>Glycine max</i>            | Activator for isoflavonoid biosynthesis                                               |
| GmMYB12B2                | AEC13303       | <i>Glycine max</i>            | Activator for flavonoid biosynthesis                                                  |
| GmMYB100                 | ABH02893       | <i>Glycine max</i>            | Inhibitor for isoflavonoid (soybean) and flavonol ( <i>Arabidopsis</i> ) biosynthesis |
| GmMYB29                  | NP_001241360.1 | <i>Glycine max</i>            | Activator for isoflavonoid biosynthesis                                               |
| GmMYB39                  | XP_006572975.1 | <i>Glycine max</i>            | Activator for isoflavonoid biosynthesis                                               |
| GmMYB133                 | NP_001237536.2 | <i>Glycine max</i>            | Activator for isoflavonoid biosynthesis                                               |
| GmMYB176                 | NP_001236048   | <i>Glycine max</i>            | Activator for isoflavonoid biosynthesis                                               |
| LjMYB14                  | ARK19306.1     | <i>Lotus corniculatus</i>     | Activator for phenylpropanoid and isoflavonoid biosynthesis                           |
| MdMYB10                  | ACQ45201       | <i>Malus domestica</i>        | Activator for anthocyanin biosynthesis                                                |
| PeMYB2                   | AIS35919       | <i>Phalaenopsis equestris</i> | Activator for anthocyanin biosynthesis                                                |
| PeMYB11                  | AIS35928       | <i>Phalaenopsis equestris</i> | Activator for anthocyanin biosynthesis                                                |
| PeMYB12                  | AIS35929       | <i>Phalaenopsis equestris</i> | Activator for anthocyanin biosynthesis                                                |
| SIMYB12                  | NP_001234401   | <i>Solanum lycopersicum</i>   | Activator for naringenin chalcone and flavonol biosynthesis                           |
| StMYB113                 | AND01219       | <i>Solanum tuberosum</i>      | Activator for anthocyanin biosynthesis                                                |
| StMYBA1                  | ALA13582       | <i>Solanum tuberosum</i>      | Activator for anthocyanin biosynthesis                                                |
| ZmC1                     | 1613412E       | <i>Zea mays</i>               | Activator for anthocyanin biosynthesis                                                |

==
