# Supplementary material for: Identification of Isoflavonoid Biosynthesis-Related R2R3-MYB Transcription Factors in Callerya speciosa (Champ. ex Benth.) Schot Using Transcriptome-Based Gene Coexpression Analysis
Source: Hindawi journal article supplement (doi:10.1155/2021/9939403), 2021-05-25
Supplement: f4 [file 9939403.f4.pdf]

**ESM\_4 List of 126 R2R3-MYB proteins/genes in *Arabidopsis*.**

| <b>Locus ID</b> | <b>Gene/Protein name</b> |
|-----------------|--------------------------|
| At3g27920       | AtMYB0                   |
| At3g09230       | AtMYB1                   |
| At3g12820       | AtMYB10                  |
| At2g25230       | AtMYB100                 |
| At2g32460       | AtMYB101                 |
| At4g21440       | AtMYB102                 |
| At1g63910       | AtMYB103                 |
| At2g26950       | AtMYB104                 |
| At1g69560       | AtMYB105                 |
| At3g01140       | AtMYB106                 |
| At3g02940       | AtMYB107                 |
| At3g06490       | AtMYB108                 |
| At3g55730       | AtMYB109                 |
| At3g62610       | AtMYB11                  |
| At3g29020       | AtMYB110                 |
| At5g49330       | AtMYB111                 |
| At1g48000       | AtMYB112                 |
| At1g66370       | AtMYB113                 |
| At1g66380       | AtMYB114                 |
| At5g40360       | AtMYB115                 |
| At1g25340       | AtMYB116                 |
| At1g26780       | AtMYB117                 |
| At3g27785       | AtMYB118                 |
| At5g58850       | AtMYB119                 |
| At2g47460       | AtMYB12                  |
| At5g55020       | AtMYB120                 |
| At3g30210       | AtMYB121                 |
| At1g74080       | AtMYB122                 |
| At5g35550       | AtMYB123                 |
| At1g14350       | AtMYB124                 |
| At3g60460       | AtMYB125                 |
| At1g06180       | AtMYB13                  |
| At2g31180       | AtMYB14                  |
| At3g23250       | AtMYB15                  |
| At5g15310       | AtMYB16                  |
| At3g61250       | AtMYB17                  |
| At4g25560       | AtMYB18                  |
| At5g52260       | AtMYB19                  |
| At2g47190       | AtMYB2                   |
| At1g66230       | AtMYB20                  |
| At3g27810       | AtMYB21                  |
| At5g40430       | AtMYB22                  |
| At5g40330       | AtMYB23                  |
| At5g40350       | AtMYB24                  |
| At2g39880       | AtMYB25                  |
| At3g13890       | AtMYB26                  |
| At3g53200       | AtMYB27                  |
| At5g61420       | AtMYB28                  |
| At5g07690       | AtMYB29                  |
| At1g22640       | AtMYB3                   |
| At3g28910       | AtMYB30                  |

|           |         |
|-----------|---------|
| At1g74650 | AtMYB31 |
| At4g34990 | AtMYB32 |
| At5g06100 | AtMYB33 |
| At5g60890 | AtMYB34 |
| At3g28470 | AtMYB35 |
| At5g57620 | AtMYB36 |
| At5g23000 | AtMYB37 |
| At2g36890 | AtMYB38 |
| At4g17785 | AtMYB39 |
| At4g38620 | AtMYB4  |
| At5g14340 | AtMYB40 |
| At4g28110 | AtMYB41 |
| At4g12350 | AtMYB42 |
| At5g16600 | AtMYB43 |
| At5g67300 | AtMYB44 |
| At3g48920 | AtMYB45 |
| At5g12870 | AtMYB46 |
| At1g18710 | AtMYB47 |
| At3g46130 | AtMYB48 |
| At5g54230 | AtMYB49 |
| At3g13540 | AtMYB5  |
| At1g57560 | AtMYB50 |
| At1g18570 | AtMYB51 |
| At1g17950 | AtMYB52 |
| At5g65230 | AtMYB53 |
| At1g73410 | AtMYB54 |
| At4g01680 | AtMYB55 |
| At5g17800 | AtMYB56 |
| At3g01530 | AtMYB57 |
| At1g16490 | AtMYB58 |
| At5g59780 | AtMYB59 |
| At4g09460 | AtMYB6  |
| At1g08810 | AtMYB60 |
| At1g09540 | AtMYB61 |
| At1g68320 | AtMYB62 |
| At1g79180 | AtMYB63 |
| At5g11050 | AtMYB64 |
| At3g11440 | AtMYB65 |
| At5g14750 | AtMYB66 |
| At3g12720 | AtMYB67 |
| At5g65790 | AtMYB68 |
| At4g33450 | AtMYB69 |
| At2g16720 | AtMYB7  |
| At2g23290 | AtMYB70 |
| At3g24310 | AtMYB71 |
| At1g56160 | AtMYB72 |
| At4g37260 | AtMYB73 |
| At4g05100 | AtMYB74 |
| At1g56650 | AtMYB75 |
| At5g07700 | AtMYB76 |
| At3g50060 | AtMYB77 |
| At5g49620 | AtMYB78 |
| At4g13480 | AtMYB79 |

|           |         |
|-----------|---------|
| At1g35515 | AtMYB8  |
| At5g56110 | AtMYB80 |
| At2g26960 | AtMYB81 |
| At5g52600 | AtMYB82 |
| At3g08500 | AtMYB83 |
| At3g49690 | AtMYB84 |
| At4g22680 | AtMYB85 |
| At5g26660 | AtMYB86 |
| At4g37780 | AtMYB87 |
| At2g02820 | AtMYB88 |
| At5g39700 | AtMYB89 |
| At5g16770 | AtMYB9  |
| At1g66390 | AtMYB90 |
| At2g37630 | AtMYB91 |
| At5g10280 | AtMYB92 |
| At1g34670 | AtMYB93 |
| At3g47600 | AtMYB94 |
| At1g74430 | AtMYB95 |
| At5g62470 | AtMYB96 |
| At4g26930 | AtMYB97 |
| At4g18770 | AtMYB98 |
| At5g62320 | AtMYB99 |
