# Supplementary material for: Identification of Isoflavonoid Biosynthesis-Related R2R3-MYB Transcription Factors in Callerya speciosa (Champ. ex Benth.) Schot Using Transcriptome-Based Gene Coexpression Analysis
Source: Hindawi journal article supplement (doi:10.1155/2021/9939403), 2021-05-25
Supplement: f5 [file 9939403.f5.pdf]

ESM 5 Summary of R2R3-MYB superfamily genes and their predicted function in *C. speciosa*.

| Group code | Name of clade or subfamily | Nomenclature used for this paper | Gene ID             | Length of CDS | Length of protein sequence | PI (aa) | MW (kDa) | Localization                                                                                                                                                      | Corresponding nomenclature for MYB members in <i>Arabidopsis</i> | Annotation in Nr database                                                                                                                                                                                                                       | Predicted function                                       |                                                                                                                                |                                          |
|------------|----------------------------|----------------------------------|---------------------|---------------|----------------------------|---------|----------|-------------------------------------------------------------------------------------------------------------------------------------------------------------------|------------------------------------------------------------------|-------------------------------------------------------------------------------------------------------------------------------------------------------------------------------------------------------------------------------------------------|----------------------------------------------------------|--------------------------------------------------------------------------------------------------------------------------------|------------------------------------------|
| 1          | C5 (S25)                   | CsMYB9                           | CL11989.Contig1_Al  | 731           | 180                        | 10.11   | 21.01    | Nuclear                                                                                                                                                           | AtMYB98                                                          | PREDICTED: myb-related protein 3R-1-like isoform X1 [ <i>Lupinus angustifolius</i> ]                                                                                                                                                            | Embryogenesis (seed, endosperm and cell differentiation) |                                                                                                                                |                                          |
|            |                            | CsMYB10                          | CL11989.Contig2_Al  | 756           | 180                        | 10.11   | 21.01    | Nuclear                                                                                                                                                           | AtMYB98                                                          | PREDICTED: myb-related protein 3R-1-like isoform X1 [ <i>Lupinus angustifolius</i> ]                                                                                                                                                            | Embryogenesis (seed, endosperm and cell differentiation) |                                                                                                                                |                                          |
|            |                            | CsMYB11                          | CL11989.Contig3_Al  | 3673          | 1050                       | 5.11    | 116.24   | Nuclear                                                                                                                                                           | AtMYB98                                                          | PREDICTED: myb-related protein 3R-1-like isoform X2 [ <i>Cicer arietinum</i> ]<br>myb-related protein 308-like [ <i>Glycine max</i> ] >KHN31220.1 Myb-related protein 308                                                                       | Embryogenesis (seed, endosperm and cell differentiation) |                                                                                                                                |                                          |
|            |                            | CsMYB18                          | CL1330.Contig2_All  | 1258          | 572                        | 8.51    | 62.96    | Nuclear                                                                                                                                                           | AtMYB4                                                           | [ <i>Glycine soja</i> ] >KRH63931.1 hypothetical protein GLYMA_04G205100 [ <i>Glycine max</i> ]                                                                                                                                                 | Embryogenesis (seed, endosperm and cell differentiation) |                                                                                                                                |                                          |
|            |                            | CsMYB19                          | CL13981.Contig1_Al  | 2314          | 572                        | 8.51    | 62.96    | Nuclear                                                                                                                                                           | AtMYB98                                                          | PREDICTED: myb-related protein B [ <i>Cicer arietinum</i> ]                                                                                                                                                                                     | Embryogenesis (seed, endosperm and cell differentiation) |                                                                                                                                |                                          |
|            |                            | CsMYB20                          | CL13981.Contig2_Al  | 2091          | 476                        | 6.88    | 53.59    | Nuclear                                                                                                                                                           | AtMYB98                                                          | PREDICTED: myb-related protein B [ <i>Cicer arietinum</i> ]                                                                                                                                                                                     | Embryogenesis (seed, endosperm and cell differentiation) |                                                                                                                                |                                          |
|            |                            | CsMYB21                          | CL1416.Contig10_Al  | 2415          | 478                        | 7.82    | 53.86    | Nuclear                                                                                                                                                           | AtMYB124                                                         | transcription factor MYB124 isoform X1 [ <i>Cajanus cajan</i> ]                                                                                                                                                                                 | Embryogenesis (seed, endosperm and cell differentiation) |                                                                                                                                |                                          |
|            |                            | CsMYB22                          | CL1416.Contig11_Al  | 1347          | 333                        | 9.11    | 38.56    | Nuclear                                                                                                                                                           | AtMYB88                                                          | transcription factor MYB124 isoform X1 [ <i>Cajanus cajan</i> ]                                                                                                                                                                                 | Embryogenesis (seed, endosperm and cell differentiation) |                                                                                                                                |                                          |
|            |                            | CsMYB23                          | CL1416.Contig12_Al  | 2892          | 477                        | 8.69    | 53.95    | Nuclear                                                                                                                                                           | AtMYB124                                                         | transcription factor MYB124 isoform X1 [ <i>Cajanus cajan</i> ]                                                                                                                                                                                 | Embryogenesis (seed, endosperm and cell differentiation) |                                                                                                                                |                                          |
|            |                            | CsMYB24                          | CL1416.Contig13_Al  | 2352          | 478                        | 8.32    | 54.07    | Nuclear                                                                                                                                                           | AtMYB124                                                         | transcription factor MYB124 isoform X1 [ <i>Cajanus cajan</i> ]                                                                                                                                                                                 | Embryogenesis (seed, endosperm and cell differentiation) |                                                                                                                                |                                          |
|            |                            | CsMYB25                          | CL1416.Contig14_Al  | 2303          | 478                        | 8.54    | 54.07    | Nuclear                                                                                                                                                           | AtMYB124                                                         | transcription factor MYB124 isoform X1 [ <i>Cajanus cajan</i> ]                                                                                                                                                                                 | Embryogenesis (seed, endosperm and cell differentiation) |                                                                                                                                |                                          |
|            |                            | CsMYB26                          | CL1416.Contig15_Al  | 2879          | 477                        | 8.54    | 53.96    | Nuclear                                                                                                                                                           | AtMYB124                                                         | transcription factor MYB124 isoform X1 [ <i>Cajanus cajan</i> ]<br>transcription factor MYB124-like isoform X1 [ <i>Cajanus cajan</i> ] >XP_020214325.1<br>transcription factor MYB124-like isoform X1 [ <i>Cajanus cajan</i> ] >XP_020214334.1 | Embryogenesis (seed, endosperm and cell differentiation) |                                                                                                                                |                                          |
|            |                            | CsMYB27                          | CL1416.Contig16_Al  | 2426          | 476                        | 8.47    | 53.9     | Nuclear                                                                                                                                                           | AtMYB124                                                         | transcription factor MYB124-like isoform X2 [ <i>Cajanus cajan</i> ]                                                                                                                                                                            | Embryogenesis (seed, endosperm and cell differentiation) |                                                                                                                                |                                          |
|            |                            | CsMYB28                          | CL1416.Contig17_All | 2787          | 334                        | 9.4     | 38.63    | Nuclear                                                                                                                                                           | AtMYB124                                                         | transcription factor MYB124 isoform X1 [ <i>Cajanus cajan</i> ]                                                                                                                                                                                 | Embryogenesis (seed, endosperm and cell differentiation) |                                                                                                                                |                                          |
|            |                            | CsMYB29                          | CL1416.Contig20_All | 1810          | 442                        | 6.45    | 49.86    | Nuclear                                                                                                                                                           | AtMYB88                                                          | PREDICTED: transcriptional activator Myb-like isoform X1 [ <i>Cicer arietinum</i> ]                                                                                                                                                             | Embryogenesis (seed, endosperm and cell differentiation) |                                                                                                                                |                                          |
|            |                            | CsMYB30                          | CL1416.Contig3_All  | 2009          | 334                        | 9.4     | 38.61    | Nuclear                                                                                                                                                           | AtMYB88                                                          | PREDICTED: transcriptional activator Myb-like isoform X1 [ <i>Cicer arietinum</i> ]                                                                                                                                                             | Embryogenesis (seed, endosperm and cell differentiation) |                                                                                                                                |                                          |
|            |                            | CsMYB31                          | CL1416.Contig4_All  | 1608          | 442                        | 8.08    | 50.03    | Nuclear                                                                                                                                                           | AtMYB88                                                          | PREDICTED: transcriptional activator Myb-like isoform X1 [ <i>Cicer arietinum</i> ]                                                                                                                                                             | Embryogenesis (seed, endosperm and cell differentiation) |                                                                                                                                |                                          |
|            |                            | CsMYB32                          | CL1416.Contig5_All  | 2009          | 477                        | 6.88    | 53.8     | Nuclear                                                                                                                                                           | AtMYB88                                                          | transcription factor MYB124 isoform X1 [ <i>Cajanus cajan</i> ]                                                                                                                                                                                 | Embryogenesis (seed, endosperm and cell differentiation) |                                                                                                                                |                                          |
|            |                            | CsMYB33                          | CL1416.Contig6_All  | 2468          | 477                        | 6.88    | 53.68    | Nuclear                                                                                                                                                           | AtMYB124                                                         | transcription factor MYB124 isoform X1 [ <i>Cajanus cajan</i> ]                                                                                                                                                                                 | Embryogenesis (seed, endosperm and cell differentiation) |                                                                                                                                |                                          |
|            |                            | CsMYB34                          | CL1416.Contig7_All  | 2915          | 477                        | 8.69    | 53.95    | Nuclear                                                                                                                                                           | AtMYB124                                                         | PREDICTED: transcriptional activator Myb-like isoform X1 [ <i>Cicer arietinum</i> ]                                                                                                                                                             | Embryogenesis (seed, endosperm and cell differentiation) |                                                                                                                                |                                          |
|            |                            | CsMYB35                          | CL1416.Contig8_All  | 3293          | 333                        | 9.11    | 38.56    | Nuclear                                                                                                                                                           | AtMYB124                                                         | transcription factor MYB124 isoform X1 [ <i>Cajanus cajan</i> ]                                                                                                                                                                                 | Embryogenesis (seed, endosperm and cell differentiation) |                                                                                                                                |                                          |
|            |                            | CsMYB96                          | Unigene39024_All    | 1512          | 426                        | 8.33    | 48.07    | Nuclear                                                                                                                                                           | AtMYB98                                                          | PREDICTED: transcription factor MYB76-like isoform X2 [ <i>Cicer arietinum</i> ]<br>myb transcription factor [ <i>Medicago truncatula</i> ] >KEH39973.1 myb transcription factor                                                                | Embryogenesis (seed, endosperm and cell differentiation) |                                                                                                                                |                                          |
|            |                            | C13 (S14)                        | C13 (S14)           | CsMYB53       | CL2723.Contig1_All         | 1255    | 370      | 7.76                                                                                                                                                              | 41.18                                                            | Nuclear                                                                                                                                                                                                                                         | AtMYB84                                                  | [ <i>Medicago truncatula</i> ]<br>myb transcription factor [ <i>Medicago truncatula</i> ] >KEH39973.1 myb transcription factor | Epidermal cells                          |
|            |                            |                                  |                     | CsMYB54       | CL2723.Contig2_All         | 1410    | 379      | 8.9                                                                                                                                                               | 42.29                                                            | Nuclear                                                                                                                                                                                                                                         | AtMYB84                                                  | [ <i>Medicago truncatula</i> ]                                                                                                 | Epidermal cells                          |
|            |                            |                                  |                     | CsMYB1        | CL10294.Contig1_Al         | 1911    | 311      | 9.27                                                                                                                                                              | 33.71                                                            | Nuclear                                                                                                                                                                                                                                         | AtMYB73                                                  | PREDICTED: transcription factor MYB44-like [ <i>Cicer arietinum</i> ]                                                          | Responses to biotic and abiotic stresses |
|            |                            |                                  |                     | CsMYB2        | CL10294.Contig2_Al         | 2025    | 311      | 9.27                                                                                                                                                              | 33.71                                                            | Nuclear                                                                                                                                                                                                                                         | AtMYB73                                                  | PREDICTED: transcription factor MYB44-like [ <i>Cicer arietinum</i> ]                                                          | Responses to biotic and abiotic stresses |
| CsMYB3     | CL10294.Contig3_Al         |                                  |                     | 2167          | 311                        | 9.27    | 33.71    | Nuclear                                                                                                                                                           | AtMYB73                                                          | PREDICTED: transcription factor MYB44-like [ <i>Cicer arietinum</i> ]                                                                                                                                                                           | Responses to biotic and abiotic stresses                 |                                                                                                                                |                                          |
| CsMYB4     | CL10294.Contig4_Al         |                                  |                     | 1768          | 317                        | 9.28    | 33.72    | Nuclear                                                                                                                                                           | AtMYB73                                                          | PREDICTED: transcription factor MYB44-like [ <i>Cicer arietinum</i> ]                                                                                                                                                                           | Responses to biotic and abiotic stresses                 |                                                                                                                                |                                          |
| CsMYB80    | Unigene1103_All            |                                  |                     | 1008          | 220                        | 9.59    | 24.51    | Nuclear                                                                                                                                                           | AtMYB73                                                          | PREDICTED: transcription factor MYB44-like [ <i>Ziziphus jujuba</i> ]                                                                                                                                                                           | Responses to biotic and abiotic stresses                 |                                                                                                                                |                                          |
| CsMYB82    | Unigene12129_All           |                                  |                     | 1707          | 353                        | 5.7     | 37.94    | Nuclear                                                                                                                                                           | AtMYB1                                                           | transcription factor MYB1 [ <i>Cajanus cajan</i> ]                                                                                                                                                                                              | Responses to biotic and abiotic stresses                 |                                                                                                                                |                                          |
| CsMYB83    | Unigene18033_All           |                                  |                     | 2961          | 351                        | 5.47    | 37.71    | Nuclear                                                                                                                                                           | AtMYB1                                                           | transcription factor MYB1 [ <i>Cajanus cajan</i> ]                                                                                                                                                                                              | Responses to biotic and abiotic stresses                 |                                                                                                                                |                                          |
| CsMYB85    | Unigene18574_All           |                                  |                     | 2518          | 351                        | 5.47    | 37.71    | Nuclear                                                                                                                                                           | AtMYB1                                                           | transcription factor MYB1 [ <i>Cajanus cajan</i> ]                                                                                                                                                                                              | Responses to biotic and abiotic stresses                 |                                                                                                                                |                                          |
| CsMYB94    | Unigene30903_All           | 1162                             | 283                 | 7.04          | 31.25                      | Nuclear | AtMYB73  | PREDICTED: transcription factor MYB44-like [ <i>Cicer arietinum</i> ]<br>transcription factor MYB1-like [ <i>Cajanus cajan</i> ] >KYP48727.1 Transcription factor | Responses to biotic and abiotic stresses                         |                                                                                                                                                                                                                                                 |                                                          |                                                                                                                                |                                          |
| C2(S22)    | C2(S22)                    | CsMYB97                          | Unigene42113_All    | 1614          | 343                        | 6.01    | 37.15    | Nuclear                                                                                                                                                           | AtMYB109                                                         | MYB44 [ <i>Cajanus cajan</i> ]                                                                                                                                                                                                                  | Responses to biotic and abiotic stresses                 |                                                                                                                                |                                          |
|            |                            | CsMYB99                          | Unigene45628_All    | 1503          | 226                        | 8.35    | 24.73    | Nuclear                                                                                                                                                           | AtMYB77                                                          | PREDICTED: transcriptional activator Myb-like [ <i>Cicer arietinum</i> ]                                                                                                                                                                        | Responses to biotic and abiotic stresses                 |                                                                                                                                |                                          |
|            |                            | CsMYB63                          | CL4544.Contig1_All  | 997           | 206                        | 9.68    | 22.99    | Nuclear                                                                                                                                                           | AtMYB14                                                          | PREDICTED: myb-related protein Myb4-like [ <i>Glycine max</i> ] >KHN14820.1 Myb-related protein Myb4 [ <i>Glycine soja</i> ] >KRH34142.1 hypothetical protein GLYMA_10G165800                                                                   | Response to cold stress                                  |                                                                                                                                |                                          |
|            |                            | CsMYB64                          | CL4544.Contig2_All  | 1107          | 206                        | 9.68    | 23.1     | Nuclear                                                                                                                                                           | AtMYB14                                                          | PREDICTED: myb-related protein Myb4-like [ <i>Glycine max</i> ] >KHN14820.1 Myb-related protein Myb4 [ <i>Glycine soja</i> ] >KRH34142.1 hypothetical protein GLYMA_10G165800                                                                   | Response to cold stress                                  |                                                                                                                                |                                          |
|            |                            | CsMYB65                          | CL6186.Contig1_All  | 1438          | 271                        | 5.1     | 30.87    | Nuclear                                                                                                                                                           | AtMYB14                                                          | PREDICTED: myb-related protein Myb4-like [ <i>Cicer arietinum</i> ]                                                                                                                                                                             | Response to cold stress                                  |                                                                                                                                |                                          |
|            |                            | CsMYB66                          | CL6186.Contig2_All  | 1463          | 267                        | 5.64    | 30.53    | Nuclear                                                                                                                                                           | AtMYB15                                                          | PREDICTED: myb-related protein Myb4-like [ <i>Cicer arietinum</i> ]                                                                                                                                                                             | Response to cold stress                                  |                                                                                                                                |                                          |
|            |                            | CsMYB67                          | CL6186.Contig3_All  | 1267          | 271                        | 5.64    | 30.9     | Nuclear                                                                                                                                                           | AtMYB15                                                          | PREDICTED: myb-related protein Myb4-like [ <i>Cicer arietinum</i> ]<br>transcription factor MYB14-like [ <i>Cajanus cajan</i> ] >KYP74659.1 Myb-related protein                                                                                 | Response to cold stress                                  |                                                                                                                                |                                          |
|            |                            | CsMYB68                          | CL6186.Contig5_All  | 1385          | 272                        | 5.25    | 31.2     | Nuclear                                                                                                                                                           | AtMYB15                                                          | Myb4 [ <i>Cajanus cajan</i> ]<br>transcription factor MYB14-like [ <i>Cajanus cajan</i> ] >KYP74659.1 Myb-related protein                                                                                                                       | Response to cold stress                                  |                                                                                                                                |                                          |
|            |                            | CsMYB69                          | CL6186.Contig6_All  | 1376          | 272                        | 5.25    | 31.2     | Nuclear                                                                                                                                                           | AtMYB15                                                          | Myb4 [ <i>Cajanus cajan</i> ]<br>transcription factor MYB14-like [ <i>Cajanus cajan</i> ] >KYP74659.1 Myb-related protein                                                                                                                       | Response to cold stress                                  |                                                                                                                                |                                          |
|            |                            | CsMYB87                          | Unigene21235_All    | 1431          | 272                        | 5.23    | 30.89    | Nuclear                                                                                                                                                           | AtMYB15                                                          | Myb4 [ <i>Cajanus cajan</i> ]                                                                                                                                                                                                                   | Response to cold stress                                  |                                                                                                                                |                                          |
| 2          | C15 (S2)                   | CsMYB95                          | Unigene36413_All    | 1037          | 282                        | 7.17    | 32.43    | Nuclear                                                                                                                                                           | AtMYB14                                                          | MYB [ <i>Ammopiptanthus nanus</i> ]<br>myb transcription factor [ <i>Medicago truncatula</i> ] >KEH23924.1 myb transcription factor                                                                                                             | Response to cold stress                                  |                                                                                                                                |                                          |
|            |                            | CsMYB101                         | Unigene699_All      | 1257          | 293                        | 4.63    | 32.84    | Nuclear                                                                                                                                                           | AtMYB15                                                          | [ <i>Medicago truncatula</i> ]                                                                                                                                                                                                                  | Response to cold stress                                  |                                                                                                                                |                                          |
|            |                            | CsMYB55                          | CL3302.Contig1_All  | 1551          | 292                        | 8.15    | 32.88    | Nuclear                                                                                                                                                           | AtMYB2                                                           | PREDICTED: transcription factor MYB108-like [ <i>Cicer arietinum</i> ]                                                                                                                                                                          | Stress responses                                         |                                                                                                                                |                                          |
|            |                            | CsMYB56                          | CL3302.Contig2_All  | 1610          | 292                        | 8.38    | 32.89    | Nuclear                                                                                                                                                           | AtMYB2                                                           | PREDICTED: transcription factor MYB108-like [ <i>Cicer arietinum</i> ]                                                                                                                                                                          | Stress responses                                         |                                                                                                                                |                                          |



|          |         |                    |                 |      |      |       |         |         |                                                                                                                                                                                                          |                                                                                                                                                |         |
|----------|---------|--------------------|-----------------|------|------|-------|---------|---------|----------------------------------------------------------------------------------------------------------------------------------------------------------------------------------------------------------|------------------------------------------------------------------------------------------------------------------------------------------------|---------|
| C14 (S3) | CsMYB90 | Unigene24590_All   | 1507            | 371  | 4.49 | 41.69 | Nuclear | AtMYB63 | Myb-related protein Zm1 [ <i>Glycine soja</i> ]                                                                                                                                                          | Lignin biosynthesis                                                                                                                            |         |
| C3       | CsMYB47 | CL10294.Contig1_AI | 1911            | 264  | 5.87 | 30.05 | Nuclear | AtMYB73 | PREDICTED: transcription factor MYB44-like [ <i>Cicer arietinum</i> ]                                                                                                                                    | Unknown                                                                                                                                        |         |
|          | CsMYB76 | CL9518.Contig1_All | 931             | 258  | 9.08 | 29.97 | Nuclear | AtMYB79 | Transcription factor MYB48 [ <i>Glycine soja</i> ]                                                                                                                                                       | Unknown                                                                                                                                        |         |
| 5        | CsMYB77 | CL9518.Contig2_All | 1314            | 255  | 7.45 | 29.55 | Nuclear | AtMYB79 | R2R3-MYB factor [ <i>Lablab purpureus</i> ]<br>PREDICTED: myb-related protein Myb4-like [ <i>Glycine max</i> ] >KRH56056.1 hypothetical                                                                  | Unknown                                                                                                                                        |         |
|          | CsMYB84 | Unigene18398_All   | 1025            | 240  | 6.05 | 27.56 | Nuclear | AtMYB9  | protein GLYMA_06G299900 [ <i>Glycine max</i> ]<br>PREDICTED: myb-related protein Myb4-like [ <i>Glycine max</i> ] >KRH56056.1 hypothetical                                                               | Unknown                                                                                                                                        |         |
|          | C7      | CsMYB100           | Unigene6882_All | 2952 | 240  | 6.05  | 27.59   | Nuclear | AtMYB9                                                                                                                                                                                                   | protein GLYMA_06G299900 [ <i>Glycine max</i> ]<br>myb transcription factor [ <i>Medicago truncatula</i> ] >AES76277.2 myb transcription factor | Unknown |
|          | CsMYB50 | CL2222.Contig2_All | 1251            | 360  | 6.65 | 40.72 | Nuclear | AtMYB52 | [ <i>Medicago truncatula</i> ]<br>transcription factor MYB14-like isoform X1 [ <i>Cajanus cajan</i> ] >KYP50300.1 Myb-related                                                                            | Unknown                                                                                                                                        |         |
|          | CsMYB51 | CL2322.Contig2_All | 1296            | 352  | 6.42 | 39.81 | Nuclear | AtMYB14 | protein Myb4 [ <i>Cajanus cajan</i> ]<br>transcription factor MYB14-like isoform X1 [ <i>Cajanus cajan</i> ] >KYP50300.1 Myb-related                                                                     | Unknown                                                                                                                                        |         |
| C16      | CsMYB52 | CL2322.Contig3_All | 1376            | 358  | 6.35 | 40.49 | Nuclear | AtMYB14 | protein Myb4 [ <i>Cajanus cajan</i> ]<br>myb transcription factor [ <i>Medicago truncatula</i> ] >AES99236.1 myb transcription factor                                                                    | Unknown                                                                                                                                        |         |
|          | CsMYB5  | CL11081.Contig1_AI | 679             | 116  | 9.4  | 13.49 | Nuclear | AtMYB20 | [ <i>Medicago truncatula</i> ]<br>myb transcription factor [ <i>Medicago truncatula</i> ] >AES99236.1 myb transcription factor                                                                           | Unknown                                                                                                                                        |         |
|          | CsMYB98 | Unigene45467_All   | 623             | 107  | 9.49 | 12.33 | Nuclear | AtMYB20 | [ <i>Medicago truncatula</i> ]<br>PREDICTED: transcription repressor MYB6-like [ <i>Vigna angularis</i> ] >KOM52988.1<br>hypothetical protein LR48_Vigan09g164700 [ <i>Vigna angularis</i> ] >BAT87828.1 | Unknown                                                                                                                                        |         |
|          | CsMYB15 | CL12323.Contig2_AI | 1195            | 178  | 9.95 | 20.75 | Nuclear | AtMYB4  | hypothetical protein VIGAN_05124000 [ <i>Vigna angularis</i> var. <i>angularis</i> ]                                                                                                                     | Unknown                                                                                                                                        |         |
