# Supplementary material for: Identification of Isoflavonoid Biosynthesis-Related R2R3-MYB Transcription Factors in Callerya speciosa (Champ. ex Benth.) Schot Using Transcriptome-Based Gene Coexpression Analysis
Source: Hindawi journal article supplement (doi:10.1155/2021/9939403), 2021-05-25
Supplement: f8 [file 9939403.f8.pdf]

**ESM 8 Sequences of primers designed for RT-qPCR analysis.**

| Type                 | Nomenclature used<br>for this paper | Sequence of primers      |
|----------------------|-------------------------------------|--------------------------|
| R2R3-MYB genes       | <i>CsMYB17-F</i>                    | GACGAGCGCCTCATAAACT      |
|                      | <i>CsMYB17-R</i>                    | ACTCTTGCCACATCTCAGCA     |
|                      | <i>CsMYB36-F</i>                    | CCACGGTTGATGAGCTTGC      |
|                      | <i>CsMYB36-R</i>                    | CTGATTGCTGGACGGTTGC      |
|                      | <i>CsMYB41-F</i>                    | TGATGTTGTGGTTGACGCTG     |
|                      | <i>CsMYB41-R</i>                    | GTGCTTCACTGCCCTTGCT      |
|                      | <i>CsMYB44-F</i>                    | CTTTGGTCCACGCACCTTTG     |
|                      | <i>CsMYB44-R</i>                    | GAGCAGCACAGAGAGTCGTT     |
|                      | <i>CsMYB45-F</i>                    | GAGGCTGATGGGGAGGACTA     |
|                      | <i>CsMYB45-R</i>                    | GGCTGCCACCACAGTATCTT     |
|                      | <i>CsMYB46-F</i>                    | ACCCAAACTGCAAACGAAGC     |
|                      | <i>CsMYB46-R</i>                    | ACCATTAGTCCTCCCCGTCA     |
|                      | <i>CsMYB72-F</i>                    | TGTTGAGCACTCCATTGGCT     |
|                      | <i>CsMYB72-R</i>                    | AGAATCTCCCCACCCTGTGA     |
| Reference gene       | <i>CsMYB81-F</i>                    | TTCGTTTCATGGTCCCGGATG    |
|                      | <i>CsMYB81-R</i>                    | CGGTGGTCACTCATAGCTGG     |
|                      | <i>GAPDH-F</i>                      | TTTGAAGAATCGGGCGTTTGG    |
|                      | <i>GAPDH-R</i>                      | TCGGTGGAAATGAAAGGGTCGTTA |
| Key structural genes | <i>CsHID-1-F</i>                    | TCATCTCAGAAAACCCCTCCA    |
|                      | <i>CsHID-1-R</i>                    | CCGCCGTGATAGTAGACCAA     |
|                      | <i>CsCHI3-F</i>                     | TCGGGGTTTATCTGGACCCT     |
|                      | <i>CsCHI3-R</i>                     | CCAGCTCCTTGGCAGGTTTA     |
|                      | <i>CsCHS7-F</i>                     | CACTAAACTTCTGGGTCTTCGC   |
|                      | <i>CsCHS7-R</i>                     | GGGCACCTTTGTTGTTCTCG     |
|                      | <i>CsIFS-F</i>                      | CTCGACGGCTACGTGATC       |
| <i>CsIFS-R</i>       | CAGAACCAAACGGCAGAA                  |                          |
