# Supplementary material for: Identification of Isoflavonoid Biosynthesis-Related R2R3-MYB Transcription Factors in Callerya speciosa (Champ. ex Benth.) Schot Using Transcriptome-Based Gene Coexpression Analysis
Source: Int J Genomics. 2021 May 25;2021:9939403. doi: 10.1155/2021/9939403 (PMC8174187; doi:10.1155/2021/9939403)
Supplement: Supplementary 7 — ESM_7: summary of the BGISEQ-500 RNA-Seq data analysis. [file 9939403.f7.pdf]

**ESM 7 Summary of the BGISEQ-500 RNA-Seq data analysis.**

| Sample      | Total Raw Reads (Mb) | Total Clean Reads(Mb) | Clean Reads Ratio (%) | Clean Reads Q20(%) | Clean Reads Q30(%) | Unigene total number | Unigene total length (Mb) | Unigene mean length (bp) | N50  | N70  | N90 | GC percentage (%) | Gene Mapped percentage (%) |
|-------------|----------------------|-----------------------|-----------------------|--------------------|--------------------|----------------------|---------------------------|--------------------------|------|------|-----|-------------------|----------------------------|
| 6-1         | 66.24                | 64.84                 | 97.88                 | 97.23              | 89.06              | 55525                | 62.44                     | 1124                     | 1751 | 1187 | 514 | 42.34             | 88.40                      |
| 6-1         | 66.11                | 64.72                 | 97.90                 | 97.63              | 90.28              | 56129                | 61.98                     | 1104                     | 1726 | 1153 | 498 | 42.38             | 88.15                      |
| 6-3         | 66.33                | 64.85                 | 97.76                 | 97.22              | 89.10              | 55547                | 62.17                     | 1119                     | 1731 | 1171 | 514 | 42.34             | 88.14                      |
| 12-1        | 66.38                | 64.81                 | 97.64                 | 97.09              | 88.72              | 57821                | 66.19                     | 1144                     | 1772 | 1189 | 531 | 41.98             | 87.27                      |
| 12-2        | 66.29                | 65.10                 | 98.20                 | 97.12              | 88.63              | 57717                | 66.72                     | 1155                     | 1784 | 1203 | 542 | 41.94             | 87.83                      |
| 12-3        | 66.25                | 64.92                 | 97.99                 | 97.13              | 88.80              | 57944                | 66.66                     | 1150                     | 1778 | 1196 | 536 | 41.93             | 87.68                      |
| 18-1        | 66.18                | 64.73                 | 97.8                  | 97.22              | 89.06              | 61154                | 63.98                     | 1046                     | 1664 | 1099 | 450 | 42.75             | 88.18                      |
| 18-2        | 68.57                | 66.94                 | 97.61                 | 97.40              | 89.58              | 57913                | 58.98                     | 1018                     | 1629 | 1055 | 435 | 42.80             | 87.84                      |
| 18-3        | 66.31                | 64.93                 | 97.92                 | 97.31              | 89.39              | 60939                | 63.68                     | 1045                     | 1661 | 1089 | 452 | 42.69             | 87.96                      |
| 30-1        | 66.34                | 64.89                 | 97.83                 | 97.06              | 88.63              | 68543                | 76.11                     | 1110                     | 1770 | 1166 | 495 | 41.92             | 88.22                      |
| 30-2        | 68.6                 | 66.83                 | 97.42                 | 97.41              | 89.56              | 67216                | 75.44                     | 1122                     | 1770 | 1179 | 506 | 41.97             | 88.82                      |
| 30-3        | 66.34                | 65.01                 | 98                    | 97.13              | 88.82              | 67465                | 74.69                     | 1107                     | 1756 | 1164 | 493 | 41.97             | 88.63                      |
| All-Unigene | --                   | --                    | --                    |                    | --                 | 153153               | 217.31                    | 1418                     | 2167 | 1497 | 742 | 41.67             |                            |
| Average     | 66.66                | 65.21                 | 97.83                 | 97.25              | 89.14              | --                   | --                        | --                       | --   |      |     | --                | 88.09                      |
| Summary     | 799.94               | 782.57                | 1173.95               |                    | --                 | --                   | --                        | --                       | --   |      |     | --                | --                         |
